# Supplementary material for: Statistical Tests for Associations between Two Directed Acyclic Graphs
Source: PubMed Central journal article supplement (PMC2886832; doi:10.1371/journal.pone.0010996), 2010-06-16
Supplement: pone.0010996.s001.pdf [file pone.0010996.s001.pdf]

## Supplement: Statistical tests for associations between two directed acyclic graphs and their application to biomedical ontologies

Robert Hoehndorf<sup>1,2,3,\*</sup>, Axel-Cyrille Ngonga Ngomo<sup>2</sup>, Michael Dannemann<sup>3</sup>, Janet Kelso<sup>3</sup>

**1 Research Group *Ontologies in Medicine*, Institute for Medical Informatics, Statistics and Epidemiology, University of Leipzig, Leipzig, Germany**

**2 Department of Computer Science, University of Leipzig, Leipzig, Germany**

**3 Department of Evolutionary Genetics, Max Planck Institute for Evolutionary Anthropology, Leipzig, Germany**

\* E-mail: leechuck@acm.org

### 1 Statistical Tests

Within this section, let  $u$  and  $v$  be fixed vertices from the directed acyclic graphs  $G_1 = (V_1, E_1)$  and  $G_2 = (V_2, E_2)$ , respectively. Furthermore, let

- $N$  be the number of permutations,
- $score^n(u, v)$  be the score between  $u$  and  $v$  in the  $n^{th}$  permutation,
- $NQ(x, u, v) = P(score^n(u, v) \leq x)$ ,  $1 \leq n \leq N$ , be the cumulative distribution function (CDF) of  $score(u, v)$ .
- $DQ^{u_j}(x, u, v) = P(score^n(u, v) - score^n(u_j, v) \leq x)$ ,  $1 \leq n \leq N$ , be the CDF of the difference between the vertex  $u$  and its  $j^{th}$  child vertex,
- $DQ(x, u, v) = \{DQ^{u_j}(x, u, v) | u_j \in child(u)\}$ ,
- $MQ^{u_k}(x, u, v) = P(score^n(u_k, v) - score^n(u, v) \leq x)$ ,  $1 \leq n \leq N$ , be the CDF of the score difference between the vertex  $u$  and its  $k^{th}$  parent vertex,
- $MQ(x, u, v) = \{MQ^{u_k}(x, u, v) | u_k \in parent(u)\}$ ,
- $VQ_{NQ}(x) = P(Var(NQ(x, x_1, x_2)) \leq x)$ , for all  $x_1 \in V_1$  and  $x_2 \in V_2$ , be the CDF of the variances  $Var$  of the distribution  $NQ(x, x_1, x_2)$ , and  $VQ_{DQ}$  and  $VQ_{MQ}$  for the distributions  $DQ(x, x_1, x_2)$  and  $MQ(x, x_1, x_2)$ , respectively.

For each child  $u_j$  of  $u$ , we calculate the difference in scores  $\delta_d(u_j) = score(u, v) - score(u_j, v)$ . Then, we compute the geometric mean  $\xi$  of all values  $DQ(\delta_d(u_j), u, v)$ . Similarly, we calculate  $\delta_m(u_k) = score(u_k, v) - score(u, v)$  for each parent  $u_k$  of  $u$ , and the geometric mean  $\psi$  of all values  $MQ(1 - \delta_m(u_k), u, v)$ . Then we define as our first test

$$\Theta^1(u, v) = NQ(score(u, v), u, v) \cdot \xi \cdot \psi \quad (1)$$

All other tests are extensions of the first test. The second test uses the minimum function instead of the geometric mean. Let  $\mu$  be the minimum of  $DQ(\delta_d(u_j), u, v)$ , and  $\nu$  be the minimum of  $MQ(1 - \delta_m(u_k), u, v)$ . Then, we define

$$\Theta^2(u, v) = NQ(score(u, v), u, v) \cdot \mu \cdot \nu \quad (2)$$

For the remaining tests, we define the CDFs  $VQ_{NQ}$ ,  $VQ_{DQ}$  and  $VQ_{MQ}$  for the variance in all  $NQ$ ,  $DQ$  and  $MQ$ , and consecutively use the  $p$ -values of the measured variance. Then, we define the tests  $\Theta^3$  and  $\Theta^4$  as

$$\Theta^3(u, v) = \Theta^1(u, v) \cdot VQ_{NQ}(1 - Var(NQ(x, u, v))) \quad (3)$$

and

$$\Theta^4(u, v) = \Theta^2(u, v) \cdot VQ_{NQ}(1 - Var(NQ(x, u, v))) \quad (4)$$

For the final two tests  $\Theta^5$  and  $\Theta^6$ , we weight each element used in the geometric mean and minimum functions in the tests  $\Theta^3$  and  $\Theta^4$  using the variance of the corresponding distributions. For  $\Theta^5$ , this means normalizing the test  $\Theta^3$  with the geometric means  $\tau$  and  $\lambda$  of the sets  $VQ_{DQ}(1 - Var(DQ(x, u, v)))$  and  $VQ_{MQ}(1 - Var(MQ(x, u, v)))$ :

$$\Theta^5(u, v) = \Theta^3(u, v) \cdot \lambda \cdot \tau \quad (5)$$

For the final test, we let the minimum function run over the values weighted by the variances. It is similar to test  $\Theta^4$ , except that the values  $\delta_d(u_j)$  and  $\delta_m(u_k)$  in the computation of  $\mu$  and  $\nu$  are replaced by  $\delta'_d(u_j) = \delta_d(u_j) \cdot (1 - VQ_{DQ}(Var(DQ^{u_j}(x, u, v))))$  and  $\delta'_m(u_k) = (1 - VQ_{DQ}(Var(MQ^{u_k}(x, u, v))))$ .

## 2 Precise formulation

Equations 7 to 12 show the precise mathematical formulation of our tests. The implementation of the six tests in Groovy is available on the project webpage. The tests illustrated in these equations are one-sided: they test the specificity of a co-occurrence based only on the ontology of the category that is used as the first argument. The final tests  $\tau^i$  are the two-sided versions of the tests  $\Theta^i$  presented above, and are defined as:

$$\tau^i(u, v) = \Theta^i(u, v) \cdot \Theta^i(v, u) \quad (6)$$

Let  $u_c^j$  be the  $j$ th child of the vertex  $u$ . Then, let  $d^j = score(u, v) - score(u_c^j, v)$ . Let  $u_p^i$  be the  $i$ th parent of the vertex  $u$ . Then, let  $m^i = score(u_p^i, v) - score(u, v)$ .

$$\Theta^1(u, v) = NQ(score(u, v), u, v) \cdot \left( \prod_j DQ(d^j, u, v) \right)^{1/N} \left( \prod_j (MQ(1 - m^j, u, v)) \right)^{1/N} \quad (7)$$

$$\Theta^2(u, v) = NQ(score(u, v), u, v) \cdot \min(DQ(d^j, u, v)) \min(MQ(1 - m^j, u, v)) \quad (8)$$

$$\Theta^3(u, v) = NQ(score(u, v), u, v) \cdot \left( \prod_j DQ(d^j, u, v) \right)^{1/N} \left( \prod_j (MQ(1 - m^j, u, v)) \right)^{1/N} \cdot VQ_{NQ}(1 - Var(NQ(x, u, v))) \quad (9)$$

$$\Theta^4(u, v) = NQ(score(u, v), u, v) \cdot \min(DQ(d^j, u, v)) \min(MQ(1 - m^j, u, v)) \cdot VQ_{NQ}(1 - Var(NQ(x, u, v))) \quad (10)$$

$$\Theta^5(u, v) = NQ(score(u, v), u, v) \cdot \left( \prod_j DQ(d^j, u, v) \right)^{1/N} \left( \prod_j (MQ(1 - m^j, u, v)) \right)^{1/N} \cdot VQ_{NQ}(1 - Var(NQ(x, u, v))) \cdot VQ_{DQ}(1 - Var(DQ^j(x, u, v))) \cdot VQ_{MQ}(1 - Var(MQ^k(x, u, v))) \quad (11)$$

$$\Theta^6(u, v) = NQ(score(u, v), u, v) \cdot \min(DQ(d^j, u, v)) \min(MQ(1 - m^j, u, v)) \cdot VQ_{NQ}(1 - Var(NQ(x, u, v))) \cdot VQ_{DQ}(1 - Var(DQ^j(x, u, v))) \cdot VQ_{MQ}(1 - Var(MQ^k(x, u, v))) \quad (12)$$

## 3 Distributions

In Figure 1, the remaining plots of the distributions of test results for the tests  $\tau^2$ ,  $\tau^3$ ,  $\tau^4$  and  $\tau^5$  are shown, together with their overlap with the GO-CL dataset.

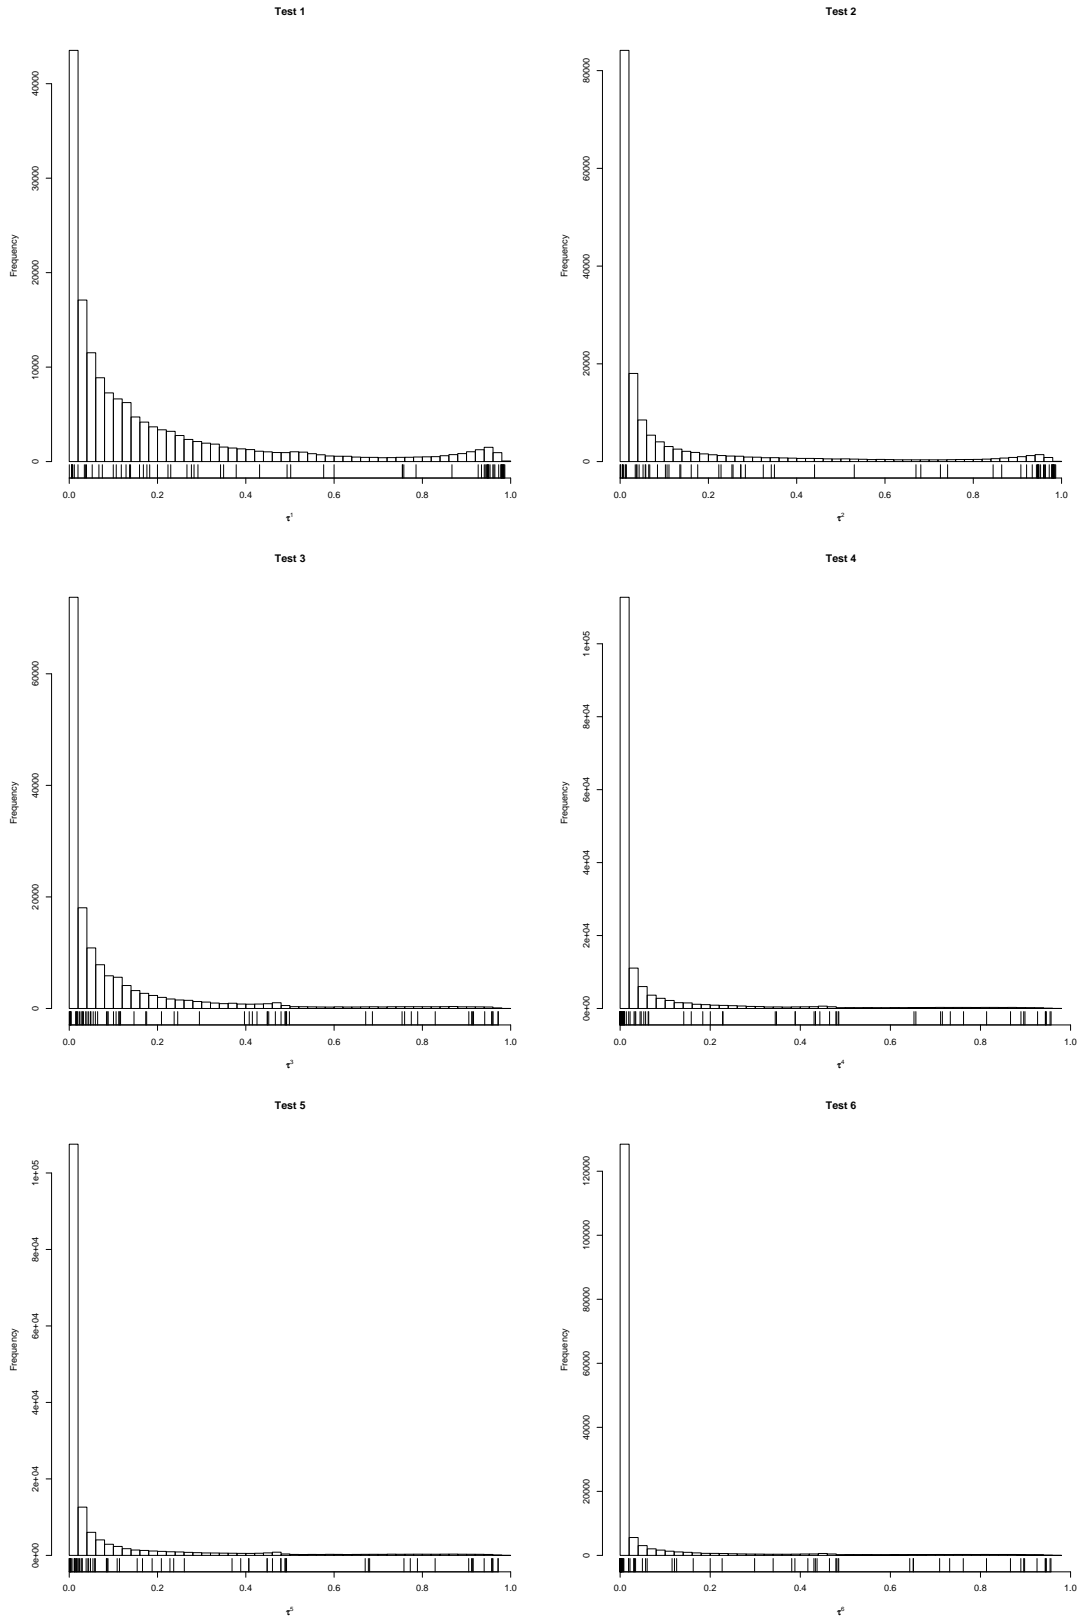

**Figure 1.** Distribution of test results. The plots show the distributions of the test results for all  $\tau^i$ . Below the distributions, the quantiles of the GO-CL dataset for each test are displayed.
